# Supplementary material for: Development of a gold nanoparticle enhanced enzyme linked immunosorbent assay based on monoclonal antibodies for the detection of fumonisin B1, B2, and B3in maize
Source: Royal Society of Chemistry journal article supplement (doi:10.1039/c8ay01036f), 2018-01-01
Supplement: c8ay01036f1.pdf [file c8ay01036f1.pdf]

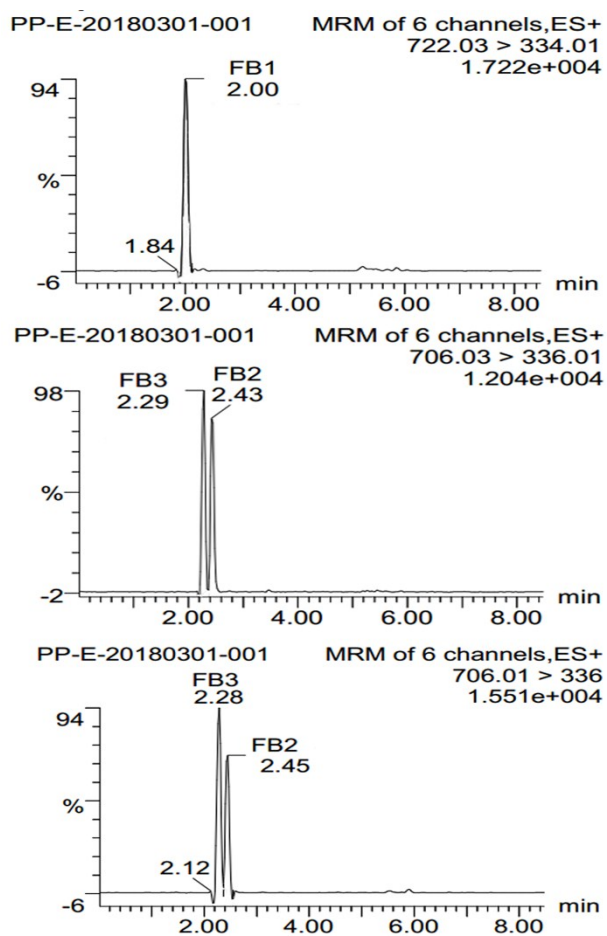

Fig. S1 LC-MS/MS Spectra of Fumonisin Standards

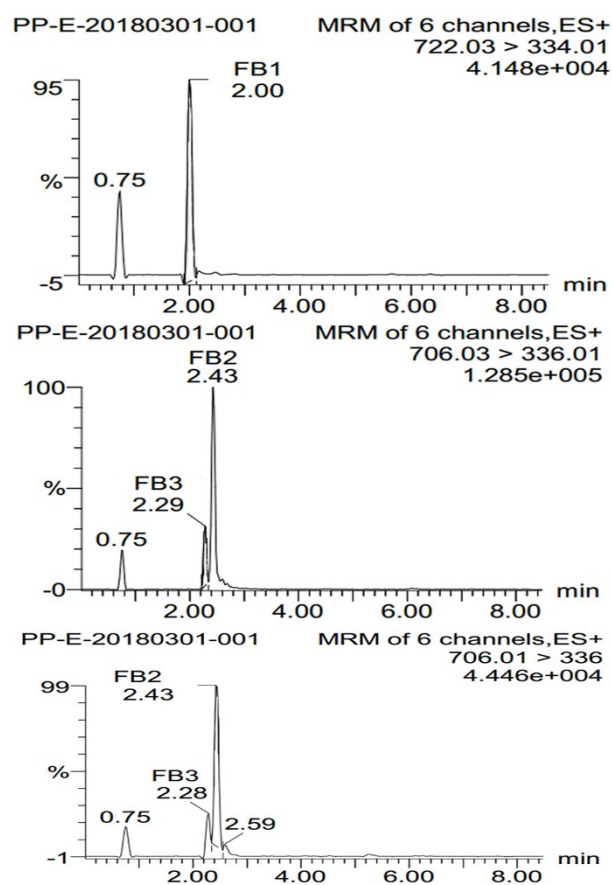

Fig. S2 LC-MS/MS Spectra of Fumonisin in Contaminated Maize Samples
